# Supplementary material for: SORCS1: A Novel Human Type 2 Diabetes Susceptibility Gene Suggested by the Mouse
Source: Oxford University Press journal article supplement (doi:10.2337/db06-1677), 2007-06-27
Supplement: db061677-sup-online_appendix_1677.doc [file db061677-sup-online_appendix_1677.doc]

| **Appendix Table 1. Taqman MGB SNP genotyping of MACAD cohort** | | |  |  |
| --- | --- | --- | --- | --- |
|  |  |  |  |  |
| **Marker** | **Location** | **Primers (5’->3’)** |  | **Probes (5’->3’)** |
|  |  |  |  |  |
| rs813756 | 106,761,882 | CCCTTCTATGCGCTTAAAAATCTG |  | Fam-CACATTCAGtAGATCAT-mgbnfq |
|  |  | CCAGCACAGCATTGACATCTAGAG |  | Vic-ACATTCAGgAGATCAT-mgbnfq |
| rs1670008 | 106,792,219 | CAGATGTTTTACTTCTAGACTTTCAGTTGA |  | Fam-AGTGACTAAcTAGGAGTATT-mgbnfq |
|  |  | AGAGTCTGACCCCTTTATAACACCTTAG |  | Vic-AGTGACTAAgTAGGAGTATT-mgbnfq |
| rs2788677 | 108,458,473 | CACAGTTGGTGCATGACAATAAAA |  | Fam-TCTCCcCCTGGCCT-mgbnfq |
|  |  | CAGGAATGGGAAGGGAAGCT |  | Vic-CTCTCCtCCTGGCCT-mgbnfq |
| rs10748924 | 108,477,170 | AGGCTGGAGTAAAGTTGCTATTCAC |  | Fam-TTGTGTTCAtAGTGCACTA-mgbnfq |
|  |  | GAGCCCAGGAGTTCAAGACTGT |  | Vic-TTGTGTTCAcAGTGCAC-mgbnfq |
| rs7067660 | 108,492,751 | GCTGTGCCAGTTTGCTTTTG |  | Fam-ATGTAAACtCCTTGGCC-mgbnfq |
|  |  | CTTTTTTTGTCATCACACTAGTTTCCTT |  | Vic-ATGTAAACcCCTTGGC-mgbnfq |
| rs10736189 | 108,502,070 | AGGAAGAACTAAAGAAGGCTCCAT |  | Fam-CGTATACgAAAGCC-mgbnfq |
|  |  | TTGTCATTTATTAGGATCACAGTGGAT |  | Vic-CGTATACcAAAGCC-mgbnfq |
| rs10509818 | 108,512,646 | ACAGAAGATGGGACAGGTCACA |  | Fam-CTCAGCATgTCCTGAA-mgbnfq |
|  |  | GGTGCCTGCTGTTGTTGTACA |  | Vic-CTCAGCATaTCCTGAAC-mgbnfq |
| rs2249022 | 108,532,319 | CCCAACCCATTAATTATTATTTGTAACAAT |  | Fam-ACCTTACTCATCTtCTATGT-mgbnfq |
|  |  | ACTGTAACTCATATGTTGTCATTCCTGAT |  | Vic-ACCTTACTCATCTcCTATGT-mgbnfq |
| rs821994 | 108,547,162 | GACTGAAAAGTAAACTACATGATGTTGTTAAC |  | Fam-TTGGAAATCcTGACCC-mgbnfq |
|  |  | AAGAAAATCTGTGTGGTTTTCATGAA |  | Vic-TTGGAAATCtTGACCCC-mgbnfq |
| rs822000 | 108,550,027 | GGACTCACCCACCAAGGAAA |  | Fam-TTGGTCaTGTCCATGAA-mgbnfq |
|  |  | TGGAGGTTTTATGTAAGTATCACTTAGCA |  | Vic-TTGGTCgTGTCCATGA-mgbnfq |
| rs2243454 | 108,567,901 | CAATAAAACATGTCAATTAATCTCTTCTTA |  | Fam-TTACCCCcAAATTT-mgbnfq |
|  |  | TGGCCAGTCAGAACTATTGATG |  | Vic-ATTATACCCCtAAATTT-mgbnfq |
| rs1538417 | 108,573,589 | GGAGACTGAGTCCCAGAGAGTTTAGT |  | Fam-CTTGTCTGAAgTTACATGC-mgbnfq |
|  |  | CACTTTCAAGGTCTAATGATCTTAGCTTAT |  | Vic-CTTGTCTGAAaTTACATGCA-mgbnfq |
| rs4390282 | 108,579,740 | GGGTGTCCCTTGATTTGA |  | Fam-ATCTGACTAaAAACTC-mgbnfq |
|  |  | AAAGTAAAAGTTTGGAAATGTCA |  | Vic-ATCTGACTAcAAACTC-mgbnfq |
| rs1537919 | 108,681,751 | AAGCCAATTTTCCATAACAGCAGTA |  | Fam-TATTCACAGgCTTGAAT-mgbnfq |
|  |  | CCAAACCCTGTGCTTTCCTAAG |  | Vic-TATTCACAGaCTTGAATGC-mgbnfq |
| rs10748932 | 108,805,465 | CCCAACAGAGGGACAAGAGACT |  | Fam-ATAATACaGCTGAACATT-mgbnfq |
|  |  | CCACAAGGTAACTCCAGGTGTTAA |  | Vic-AATAATACgGCTGAACAT-mgbnfq |
| rs11193188 | 108,805,896 | AGACATTGGTTGTTACAGGGTAAAAGT |  | Fam-CACAATAAACgTCCTATC-mgbnfq |
|  |  | TTTCTGAGGTCCTTTCTCATTCCT |  | Vic-CACAATAAACaTCCTATC-mgbnfq |
| rs11193190 | 108,808,277 | CCTTGACTATAATTTTCTTCGATGAT |  | Fam-AGCCTGgAGTGCCT-mgbnfq |
|  |  | AGGCATTATGCACTGGGAAT |  | Vic-AGCCTGaAGTGCC-mgbnfq |
| rs7086426 | 108,837,197 | ATAAAAGACAATGTAATATAATGGAAAGTT |  | Fam-CTGATACATCTACgTTGAT-mgbnfq |
|  |  | CTGCTGGGAAGTAATAGAACCA |  | Vic-CTGATACATCTACaTTGAT-mgbnfq |
| rs607437 | 108,870,445 | TGATGCATGGCCGGTTTA |  | Fam-TTTGCCTcTCAAGTTA-mgbnfq |
|  |  | GAGGACTCTTTCCATGAAACCAA |  | Vic-CTTTGCCTtTCAAGTTA-mgbnfq |
| rs685316 | 108,883,709 | TCAGCAATTTGTGGCAAAGTTT |  | Fam-TTGGAAGCTaTAGTTCT-mgbnfq |
|  |  | GTGTCAAAAGACTGCTGAACGAA |  | Vic-TTGGAAGCTgTAGTTCT-mgbnfq |
| rs7897974 | 108,886,554 | TCAAGCACACGCTATGTGATCTC |  | Fam-TCACATTCgTAGCTAAT-mgbnfq |
|  |  | GCAGGGAGGCTGTCAGTGTAG |  | Vic-TTCACATTCaTAGCTAAT-mgbnfq |
| rs1251753 | 108,888,293 | AATGTAAATGTGAACTGATGTCTCTGTCT |  | Fam-CTATCTTAaACGAAGAAT-mgbnfq |
|  |  | AACTGTGCCCAGGGTTGATG |  | Vic-CTATCTTAgACGAAGAAT-mgbnfq |
| rs1530248 | 109,250,514 | CTCTTTAGCTCCACTTAGGACCTTTATT |  | Fam-TCTTCTGaTAGGGCCAC-mgbnfq |
|  |  | TCTCTGGACAAAGGTGGCATAAT |  | Vic-TCTTCTGgTAGGGCCA-mgbnfq |
|  |  |  |  |  |
| DNA samples from the Mexican-American Coronary Artery Disease (MACAD) project were genotyped using TaqMan MGB | | | | |
| technology (Applied Biosystems, Foster City, CA) as described in Methods and ABI Bulletin 4317594. Each marker is designated | | | | |
| by “rs number” following the dbSNP of the National Center for Biotechnology Information. The location is the nucleotide position of | | | | |
| each polymorphism in the May 2004 assembly of the UCSC Genome Browser (http://www.genome.ucsc.edu; human genome | | | | |
| build 17, NCBI build 35). “Fam” and “Vic” are laser-activated fluorescent dyes; “mgbnfq” is the “minor groove binder | | | | |
| non-fluorescent quencher” attached to the 3’-end of the probe and integral to the allele discrimination of this technology. | | | | |

| **Appendix Table 2. TaqMan MGB SNP Genotyping in SAFADS** | | |  |
| --- | --- | --- | --- |
|  |  |  |  |
| **NCBI dbSNP ID** |  | **Primers (5’->3’)** | **Probes (5’->3’)** |
|  |  |  |  |
| rs7067660 |  | GCTGTGCCAGTTTGCTTTTG | Fam-ACTCATGTAAACcCCTTG |
|  |  | TGTCATCACACTAGTTTCCTTGGC | Vic-AACTCATGTAAACtCCTTG |
| rs10736189 |  | CAGGAAGAACTAAAGAAGGCTCCAT | Fam-AGGTGGGCTTTgGTAT |
|  |  | TGTCATTTATTAGGATCACAGTGGATCTTTC | Vic-CAGGTGGGCTTTcGTAT |
| rs10509818 |  | AGTGTATACATGGCCTGCTTCTTG | Fam-CTCTCAGCATgTCCTG |
|  |  | CCTCTGTGTTGAAATACCAGGTGTT | Vic-TCTCAGCATaTCCTG |
| rs2249022 |  | TTCAGTACCTCTTGGCCAATTCC | Fam-CAGAGTACATAGgAGATGA |
|  |  | CCAAGGACTGTAACTCATATGTTGTCA | Vic-ACAGAGTACATAGaAGATGA |
|  |  |  |  |
|  |  |  |  |
| DNA samples from the San Antonio Family Diabetes Study (SAFADS) were genotyped using TaqMan MGB | | | |
| technology (Applied Biosystems, Foster City, CA) as described in Methods and ABI Bulletin 4317594. Each marker is | | | |
| designated by “rs number” following the dbSNP of the National Center for Biotechnology Information. | | | |
